# Supplementary material
Source: Springer Nature journal article supplement (https://www.springermedizin.de/resource/supplementary/13058_2012_3026_MOESM2_ESM.pdf/9703110)

**A**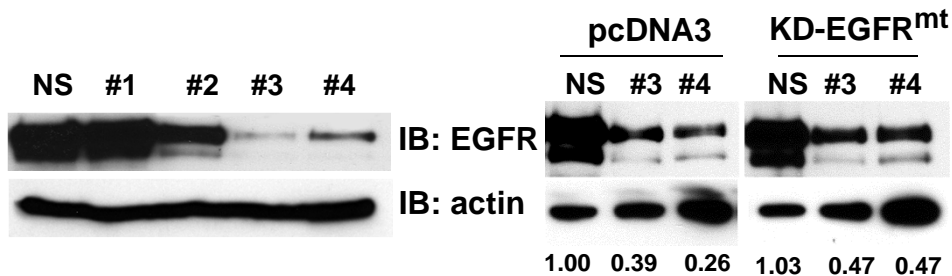**B**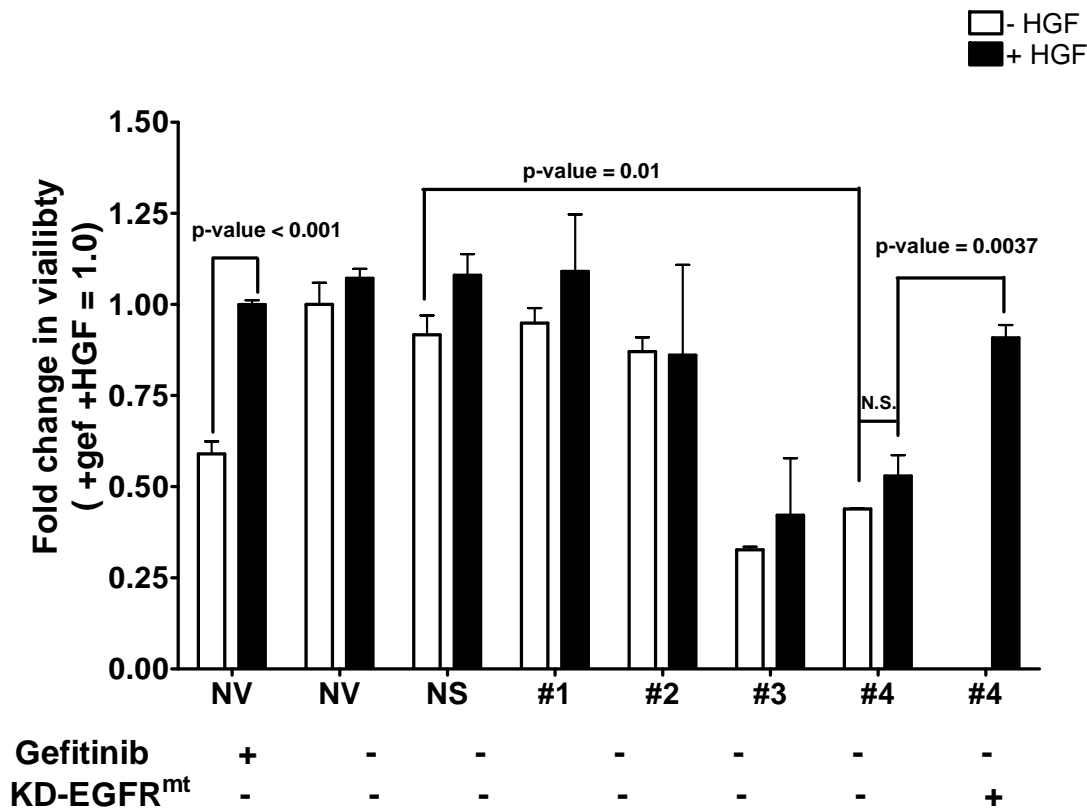

Supplement: MOESM2 [file 9703110]
